# Supplementary material
Source: PubMed Central journal article supplement (PMC10805386)

## Supplementary Material

Supplementary Table 1. Correlations between music training, musical aptitude, melody discrimination, pitch discrimination, rhythm discrimination, verbal ability, spatial ability, logical ability and technical ability. Above the diagonal full correlations and below the diagonal partial correlations while controlling for general intelligence.

|                       | Music training | Musical aptitude | Melody discrimination | Pitch discrimination | Rhythm discrimination | Verbal ability | Spatial ability | Logical ability | Technical ability | General intelligence |
|-----------------------|----------------|------------------|-----------------------|----------------------|-----------------------|----------------|-----------------|-----------------|-------------------|----------------------|
| Music training        | -              | .35**            | .27**                 | .33**                | .18**                 | .11*           | .07*            | .09**           | .08*              | .07*                 |
| Musical aptitude      | .35**          | -                | .79**                 | .75**                | .76**                 | .36**          | .31**           | .39**           | .33**             | .38**                |
| Melody discrimination | .27**          | .78**            | -                     | .41**                | .42**                 | .24**          | .21**           | .24**           | .21**             | .27**                |
| Pitch discrimination  | .33**          | .73**            | .36**                 | -                    | .33**                 | .25**          | .22**           | .30**           | .28**             | .30**                |
| Rhythm discrimination | .17**          | .73**            | .37**                 | .26**                | -                     | .33**          | .27**           | .37**           | .26**             | .31**                |
| Verbal ability        | .08*           | .25**            | .16**                 | .15**                | .24**                 | -              | .48**           | .68**           | .45**             | .38**                |
| Spatial ability       | .02            | .14**            | .10**                 | .07*                 | .13**                 | .35**          | -               | .58**           | .54**             | .54**                |
| Logical ability       | .06            | .24**            | .12**                 | .16**                | .25**                 | .60**          | .41**           | -               | .52**             | .55**                |
| Technical ability     | .05            | .20**            | .12**                 | .17**                | .15**                 | .33**          | .41**           | .38**           | -                 | .45**                |

\*\* $p < .001$ , \* $p < .05$ . Note that melody, pitch and rhythm discrimination form part of the overall musical aptitude score.

Supplementary Table 2. Twin correlations per zygoty group for musical aptitude, verbal ability, music training and general intelligence.

|                      | Musical aptitude | Verbal ability | Music training | General intelligence |
|----------------------|------------------|----------------|----------------|----------------------|
| <b>MZ male twins</b> | .72 (.65-.77)    | .74 (.67-.79)  | .59 (.51-.66)  | .63 (.56-.69)        |
| <b>DZ male twins</b> | .53 (.40-.62)    | .46 (.32-.58)  | .38 (.23-.51)  | .39 (.28-.49)        |

Supplementary Figure 1. The relationship between musical aptitude and verbal ability ( $r = .36$ ), music training and verbal ability ( $r = .11$ ) and their best linear fit when adjusting for general intelligence ( $r = .25$  and  $.08$  respectively).

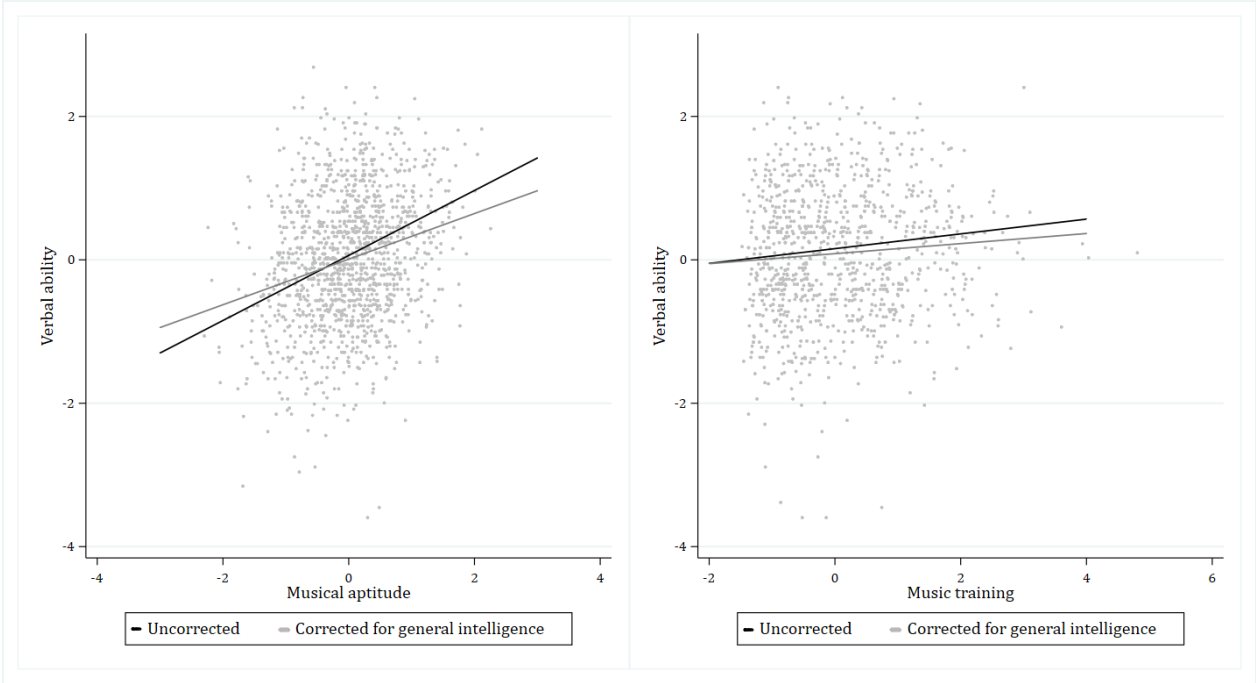

Supplement: NIHMS1697954-supplement-Supplemental_Material_1.pdf [file NIHMS1697954-supplement-Supplemental_Material_1.pdf]
