# Supplementary material
Source: PubMed Central journal article supplement (PMC10805386)
Supplement: NIHMS1697954-supplement-Supplemental_Material_2.pdf [file NIHMS1697954-supplement-Supplemental_Material_2.pdf]

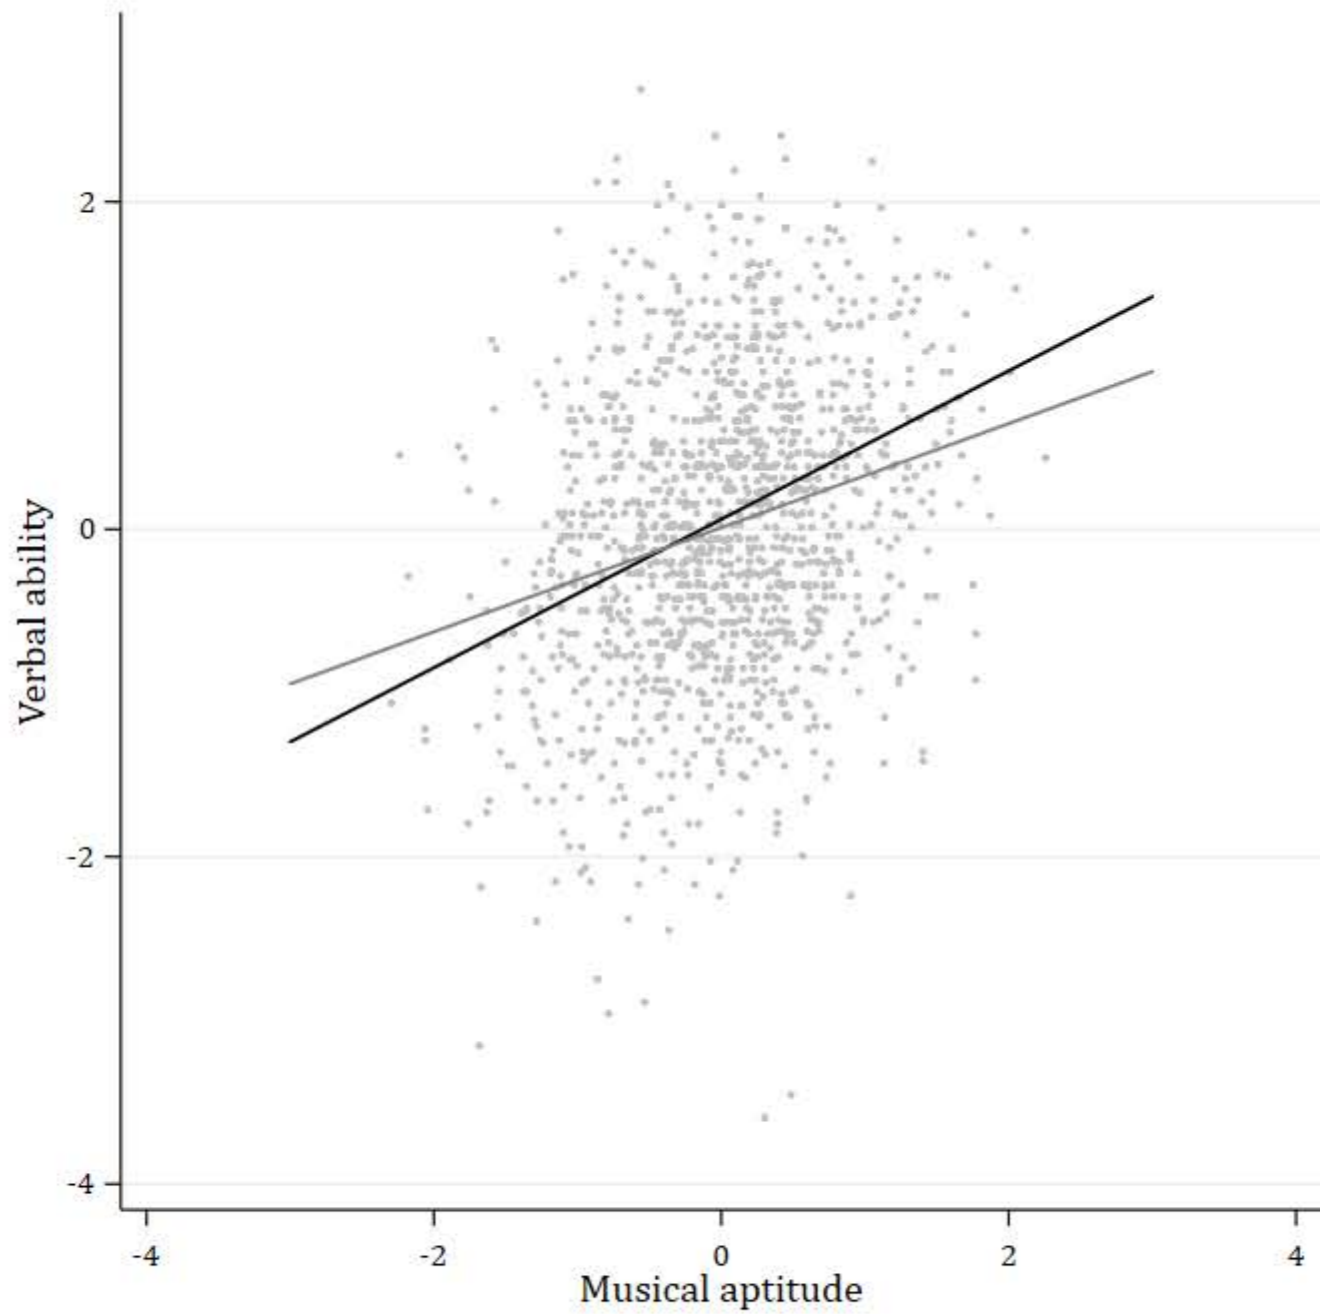

— Uncorrected    — Corrected for general intelligence

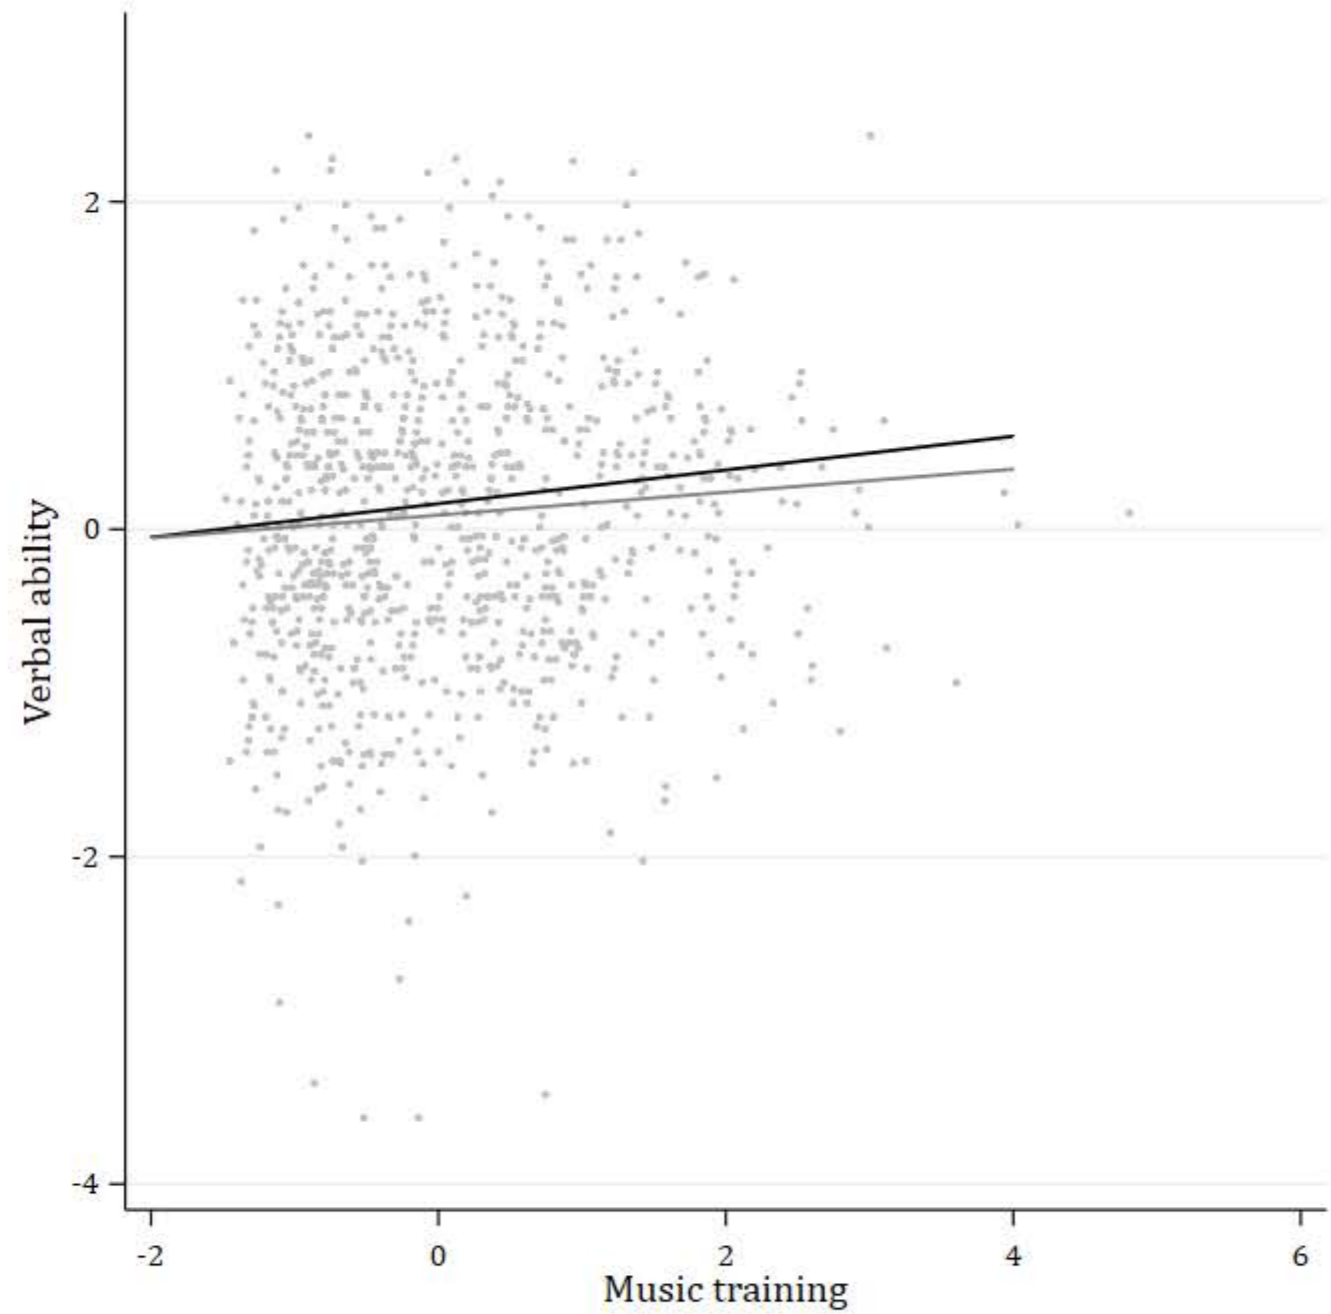

— Uncorrected    — Corrected for general intelligence
